# Supplementary material for: The effect of sequence context on the activity of cytosine DNA glycosylases
Source: Royal Society of Chemistry journal article supplement (doi:10.1039/c5mb00532a), 2015-10-07
Supplement: c5mb00532a1.pdf [file c5mb00532a1.pdf]

## Supplementary Material

### The effect of sequence context on the activity of cytosine DNA glycosylases.

Scott T. Kimber<sup>1</sup>, Tom Brown<sup>2</sup>, Keith R. Fox<sup>1\*</sup>

<sup>1</sup>Centre for Biological Sciences, Life Science Building 85, University of Southampton,  
Highfield, Southampton SO17 1BJ, U.K.

<sup>2</sup>Department of Chemistry, University of Oxford, Chemistry Research Laboratory, 12  
Mansfield Road, Oxford, OX1 3TA, UK.

### Sequences of oligonucleotides that were used to construct hUDG

5' -AGCTCAGTCATATGGGCGGCTTTGGAGAGAGCTGGAAGAA-3'  
5' -CTTGATAAAAATACGGTTTCCCGAACTCCCCGCTGAGGTGCTTCTTCCAGCTCTCTCCAAA-3'  
5' -GGAAACCGTATTTTATCAAGCTAATGGGATTTGTTGCAGAAGAAAGAAAGCATTACTG-3'  
5' -ATCTGGGTCCAGGTGAAGACTTGGTGTGGGGGTGGATAAACAGTGTAAATGCTTTCTTTCT-3'  
5' -GTCTTACCTGGACCCAGATGTGTGACATAAAAGATGTGAAGGTTGTCATCCTGGGACAG-3'  
5' -GCAGAGCCCGTGAGCTTGATTAGGTCCATGATATGGATCCTGTCCCAGGATGACAACCT-3'  
5' -TCAAGCTCACGGGCTCTGCTTTAGTGTTCAAAGGCCTGTTCCGCCTCCGCCAGTTTGGGA-3'  
5' -AAAATCCTCTATGTCTGTAGACAACCTCTTTATAAATGTTCTCCAAACTGGGCGGAGGCGG-3'  
5' -CTACAGACATAGAGGATTTTGTTCATCCTGGCCATGGAGATTTATCTGGGTGGGCCAAGC-3'  
5' -GCACGAACCGTGAGGACAGCGTTGAGAAGGAGAACACCTTGCTTGGCCCACCCAGATAAAA-3'  
5' -GCTGTCCTCACGGTTCGTGCCATCAAGCCAACCTCATAAGGAGCGAGGCTGGGAGCAG-3'  
5' -TCGAGTTCTGATTTAGCCAGGACACAACCTGCATCAGTGAACCTGCTCCCAGCCTCGCTCCT-3'  
5' -CTGGCTAAATCAGAACTCGAATGGCCTTGTTTTCTTGCTCTGGGGCTCTTATGCTCAGAA-3'  
5' -TAGTACATGGTGCCGCTTCCTATCAATGGCACTGCCCTTCTTCTGAGCATAAGAGCCCCA-3'  
5' -GGAAGCGGCACCATGTACTACAGACGGCTCATCCCTCCCCTTTGTCAGTGTATAGAGGGTTC-3'  
5' -AGCAGCTCATTTGGTCTTTGAAAAGTGTCTACATCCAAAGAACCCTCTATACTGA-3'  
5' -TCAAAGACCAATGAGCTGCTGCAGAAGTCTGGCAAGAAGCCCATTGACTGGAAGGAGCTG-3'  
5' -TCCGAGTCGAATTCTCACAGCTCCTTCCAGTCAATGG-3'

hUDG was generated by complete gene synthesis from two rounds of PCR. The first round produced a mixed product of varying length that contained a small proportion of full length products. The product was subjected to further amplification using the terminal oligonucleotides to increase the amount of full length product. This product was further purified by PCR clean-up and cloned into pET28a. hUDG then underwent successful site directed mutagenesis to produce hCDG (N204D) and hCYDG (N204D:L272A), and expressed in *E. coli*.
